# Supplementary material for: Innate immunity limits protective adaptive immune responses against pre-erythrocytic malaria parasites
Source: PubMed Central journal article supplement (PMC6718385; doi:10.1038/s41467-019-11819-0), 2019-09-02
Supplement: 41467_2019_11819_MOESM1_ESM.pdf [file 41467_2019_11819_MOESM1_ESM.pdf]

**Supplementary Figures for Minkah et al 2019, "Innate immunity limits protective adaptive immune responses against pre-erythrocytic malaria parasites"**

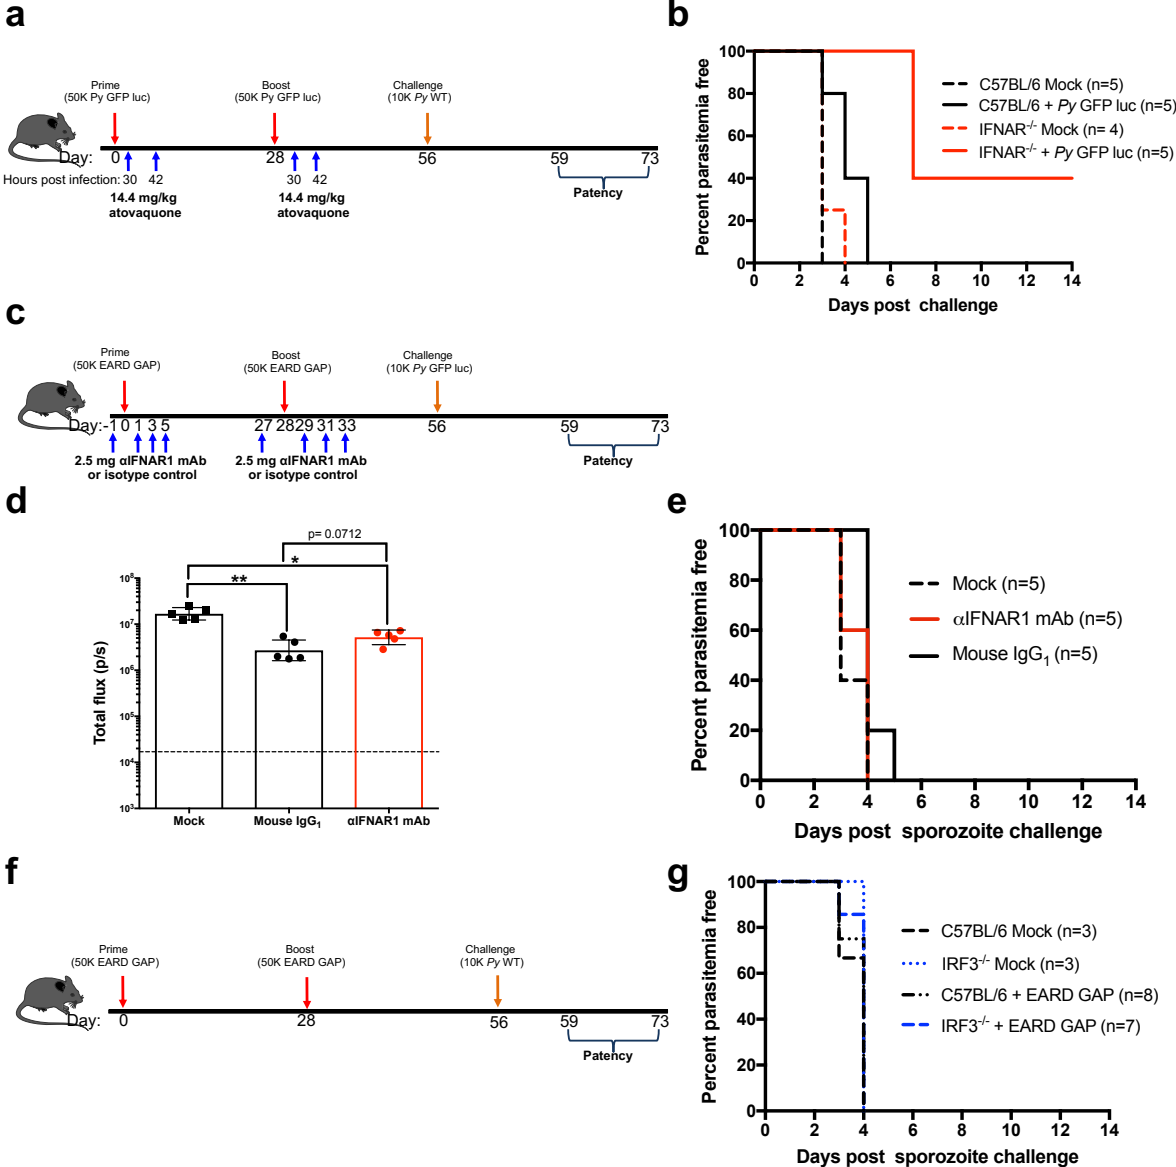

**Supplementary Figure 1. Protection is enhanced in IFNAR<sup>-/-</sup> mice immunized with atovaquone-killed liver stage parasites. (A)** Schematic of immunization regimen. **(B)** Examination of blood stage infection in immunized mice after sporozoite challenge 30 days post last immunization. Total number of mice in each experiment is shown in the survival curves. **(C)** Schematic of the GAP-immunization regimen. **(D)** Quantification of parasite liver burden 42 hours after challenge with *Py* GFP luc. **(E)** Measurement of blood stage infection in EARD GAP immunized B6 mice treated with isotype control antibody or anti-IFNAR1 antibody. **(F)** Schematic of GAP-immunization regimen. **(G)** Measurement of blood stage infection in EARD GAP immunized B6 mice and IRF3<sup>-/-</sup> mice. Data from panels B, D, and E represent one of two independent experiments. Data in panel G is compiled from two independent experiments with at least 3 EARD GAP immunized mice per group. Total number of mice in each experiment is shown in the survival curves. Bars represent mean  $\pm$  SD. \* $p < 0.05$  and \*\* $p < 0.005$  (From unpaired two-tailed Student's t-test). Components of this figure were created using Servier Medical Art templates, which are licensed under a Creative Commons Attribution 3.0 Unported License; <https://smart.servier.com>

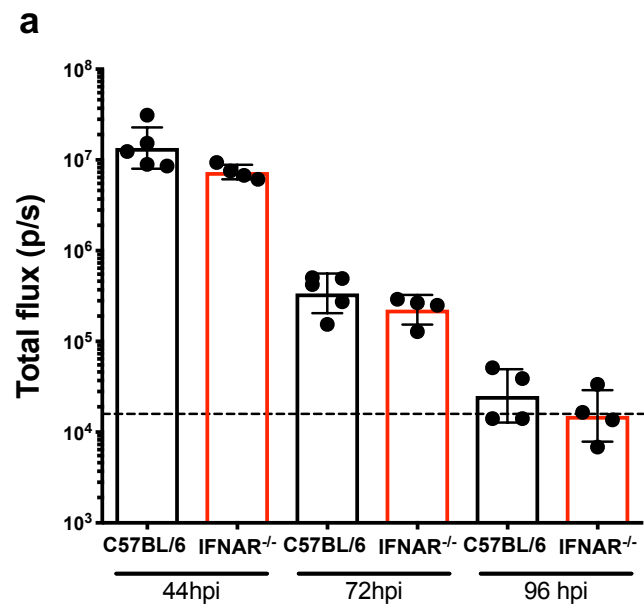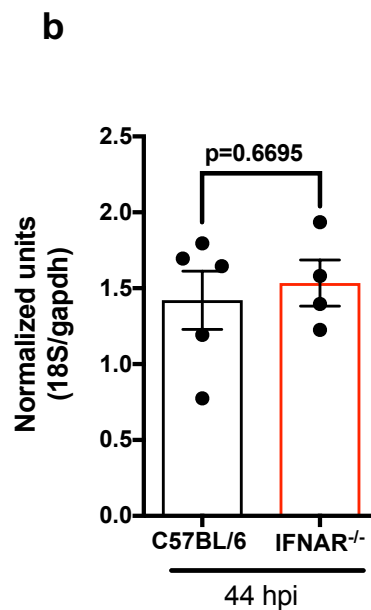

**Supplementary Figure 2. Loss of IFN-1 signaling does not impact the magnitude or persistence of *Py* LARC GAP in the liver.** B6 mice were infected with 50,00 LARC GAP sporozoites and parasite burden was quantified by *in vivo* bioluminescent imaging (**A**) and qRT-PCR (**B**) Data represent one of two independent experiments with at least 3 mice per group. Each dot represents a single mouse. Bars represent mean +/- SD.

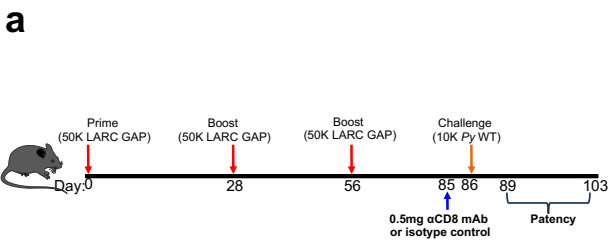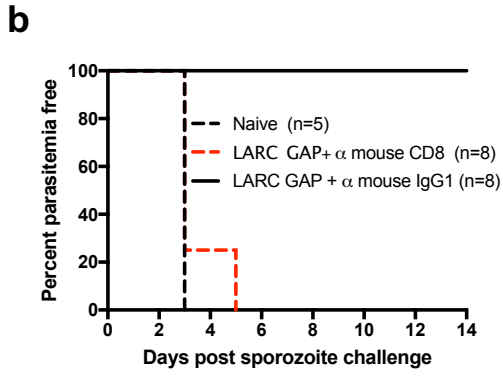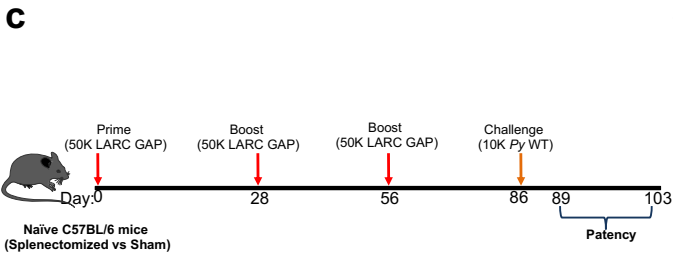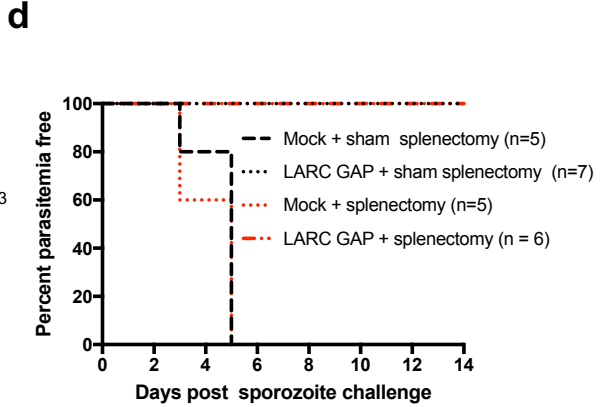

**Supplementary Figure 3. Memory CD8 T cells are critical for protection but the spleen is dispensable after**

**LARC GAP immunization (A)** Schematic of the GAP-immunization regimen. **(B)** Measurement of blood stage infection in LARC GAP immunized B6 mice treated with isotype control antibody or anti-CD8 antibody. **(C)** Schematic of the GAP-immunization regimen. **(D)** Measurement of blood stage infection in LARC GAP immunized B6 mice. Data from panels B and D are compiled from two independent experiments with at least two mock immunized or naive mice and at least 3 LARC GAP immunized mice in each group. Bars represent mean  $\pm$  SD. \* $p < 0.05$  and \*\* $p < 0.005$ .

Total number of mice in each experiment is shown in the survival curves. Components of this figure were created using Servier Medical Art templates, which are licensed under a Creative Commons Attribution 3.0 Unported License;

<https://smart.servier.com>

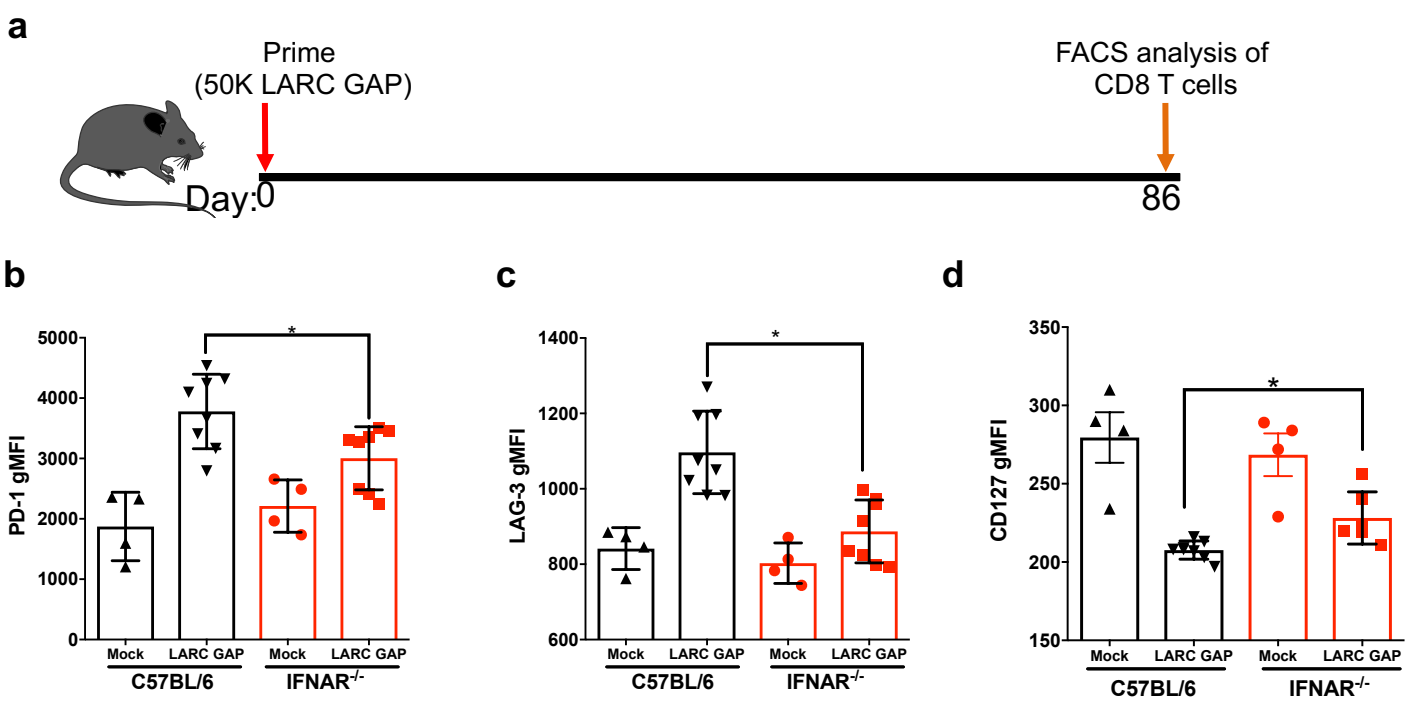

**Supplementary Figure 4. The quality of the memory CD8 T cell response is enhanced in immunized IFNAR<sup>-/-</sup> mice**

**(A)** Schematic of the GAP-immunization regimen and experimental setup **(B)** Expression of the co-inhibitory marker, PD-1 on CD44<sup>hi</sup> CD8 T lymphocytes in immunized IFNAR<sup>-/-</sup> mice and B6 mice. **(C)** Expression of the co-inhibitory marker LAG-3 on CD44<sup>hi</sup> CD8 T lymphocytes in immunized IFNAR<sup>-/-</sup> and B6 mice. **(D)** Expression of the IL-7R $\alpha$  on CD44<sup>hi</sup> CD8 T lymphocytes in immunized IFNAR<sup>-/-</sup> and B6 mice. Data are compiled from two independent experiments with 2 mock-immunized and at least 3 GAP-immunized mice in each group. Each dot represents an individual mouse. Bars represent mean  $\pm$  SD. \* $p < 0.05$ , and \*\* $p < 0.005$  (From unpaired two-tailed Student's t-test).

Components of this figure were created using Servier Medical Art templates, which are licensed under a Creative Commons Attribution 3.0 Unported License; <https://smart.servier.com>

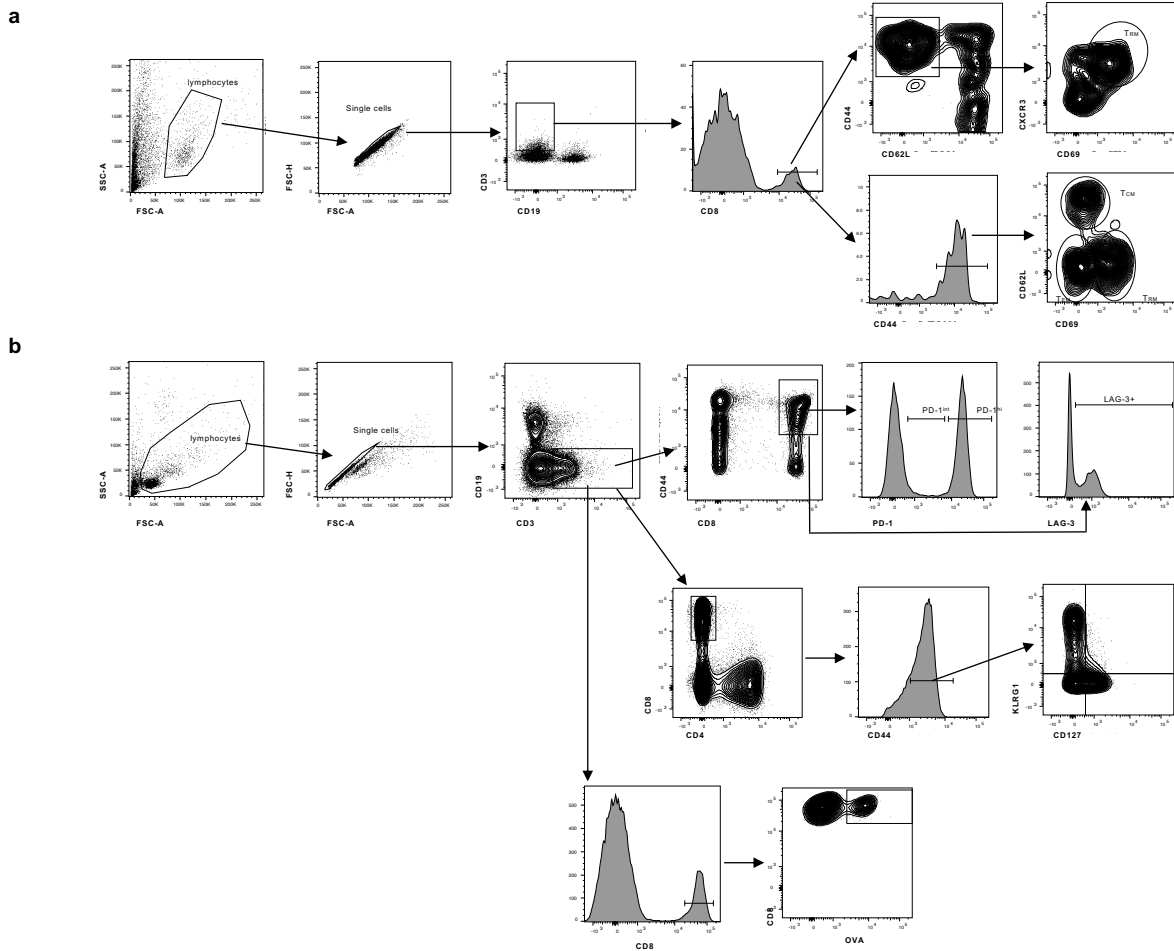

**Supplementary Figure 5. Gating strategies used for presented flow cytometric data (A) Gating strategy to identify hepatic memory CD8 T cells presented in figures 2b,2d,2e,3c,3e,3f and 6c (B) Gating strategy to identify PD-1, LAG-3 and CD127 expression on memory CD8 T cells, SLEC (KLRG1<sup>hi</sup> CD127<sup>lo</sup>) and MPEC (KLRG1<sup>lo</sup> CD127<sup>hi</sup>) CD8 T cells and OVA expressing CD8 T cells after immunization with LARC GAP as presented in figures 4,5 and 6 as well as supplementary figures 4b and 4c.**
